# Supplementary material
Source: JCI journal article supplement (doi:10.1172/jci176281)
Supplement: sd1 [file 1]

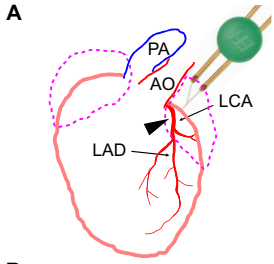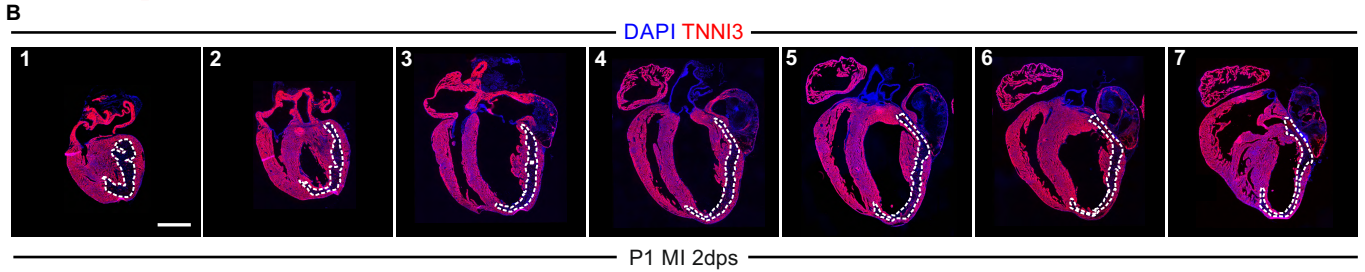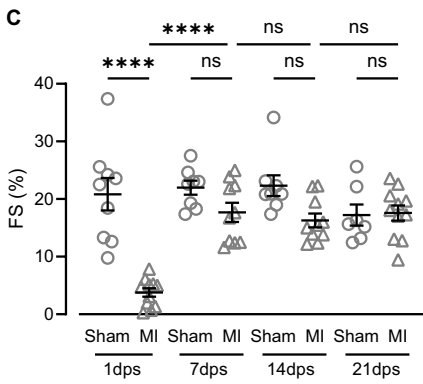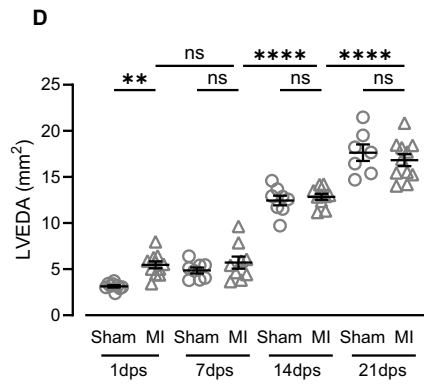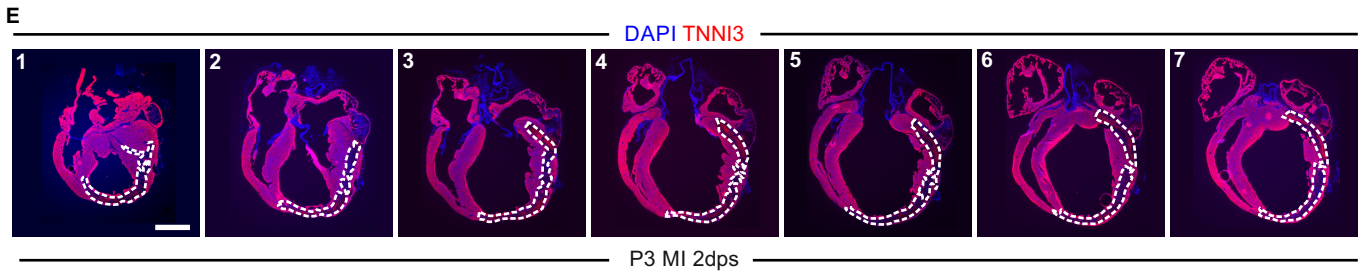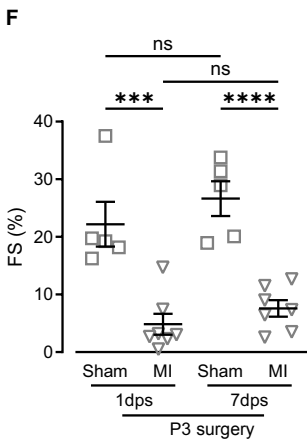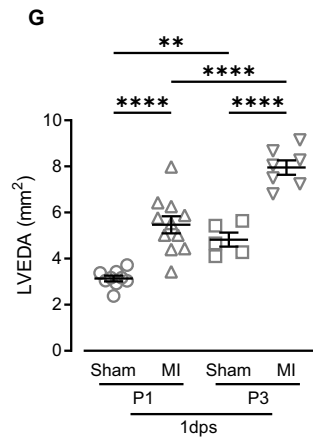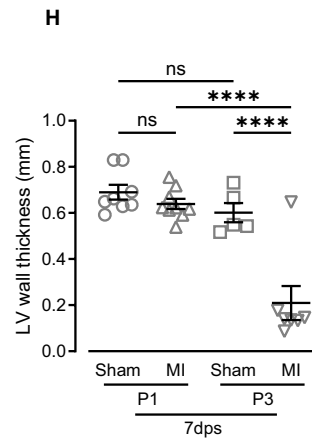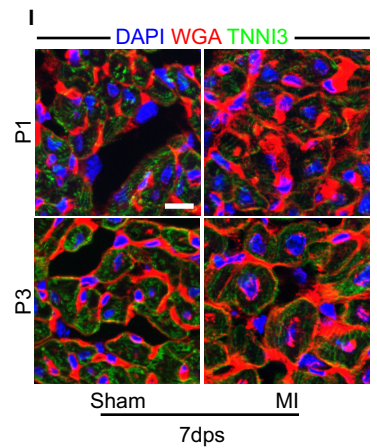

**Supplemental Figure 1: Histological and echocardiographic analysis of P1 and P3 MI, and sham hearts.**

(A) Scheme of the cauterization injury of the LCA (black arrowhead) in the neonatal mouse heart; PA = Pulmonary Artery; Ao = Aorta; LAD = Left Anterior Descending coronary artery; LCA = Left Coronary Artery. (B) Serial sections taken at approximately equal distance through a P1 MI heart co-stained against TNNI3 and DAPI; dashed lines mark infarct areas; scale bar=1mm. (C and D) Echocardiographic assessment of fractional shortening (FS) (C) and LV end-diastolic area (LVEDA) (D) after P1 surgery. (E) Serial sections through a P3 MI heart co-stained as in A; scale bar=1mm. (F-H) Echocardiographic assessment of FS (F), LVEDA (G) and LV wall thickness (H). (I) CM cross-sectional area measured in heart sections co-stained against WGA, TNNI3 and DAPI. Scale bar=20 $\mu$ m; (\*\*p<0.01; \*\*\*\*p<0.0001; ns = no significance; one-way ANOVA with Holm-Šídák post hoc test).

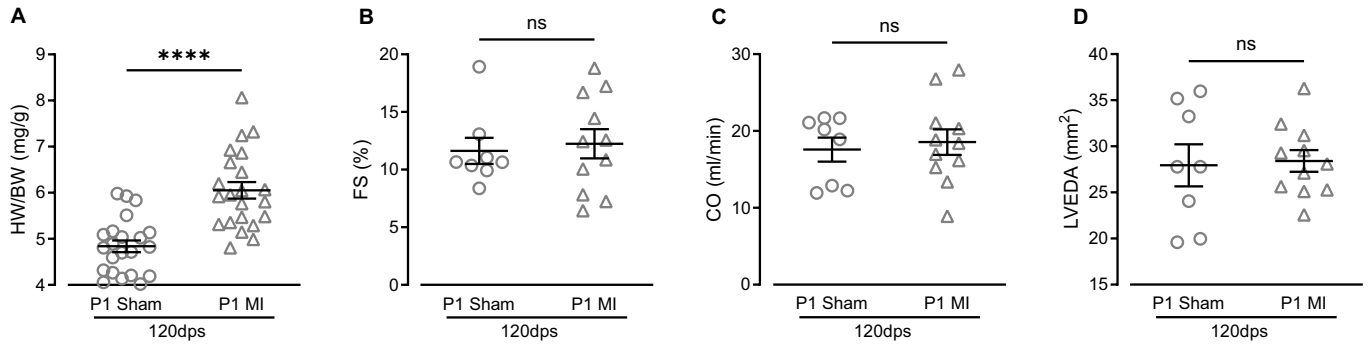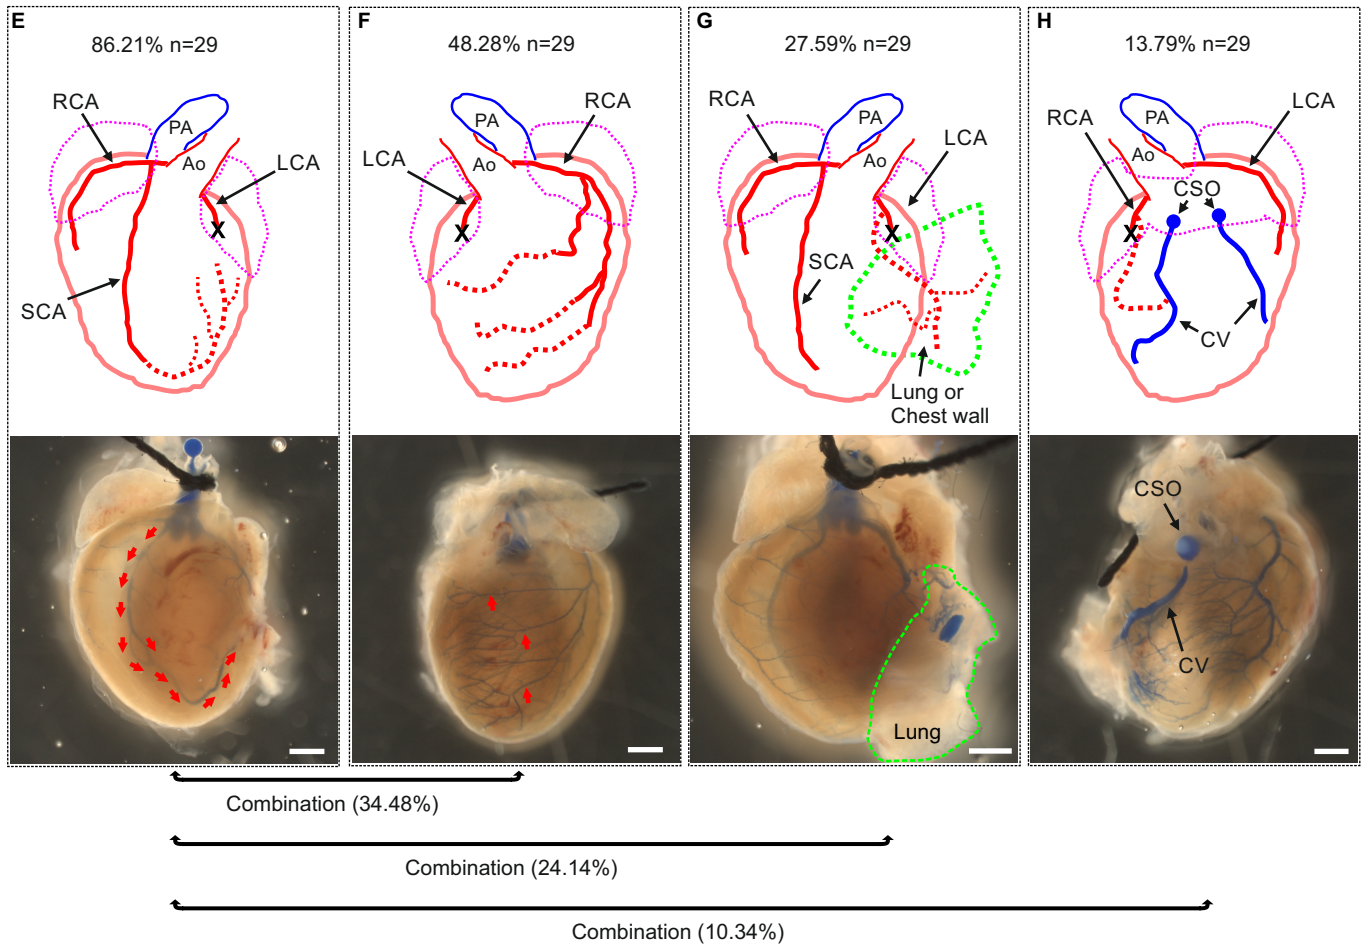

**Supplemental Figure 2: Histological and echocardiographic analysis of P1 MI and sham hearts at 120 dps, vessel casting in P1 MI hearts at 21 dps.**

(A) Quantitation of heart- to body weight (HW/BW) ratio. (B-D) Echocardiographic assessment of FS (B), Cardiac Output (CO) (C) and LVEDA (D). (E-H) Schematics (upper panels) of collateral vessels connecting the LV coronary artery to septal coronary artery (E), right coronary artery (F), lung or other extra cardiac vessels (G) and coronary veins (H). Images of coronary artery vessel casting (lower panels) in P1 MI hearts; red arrows mark the extension of branches of septal (E) and right coronary artery (F), numbers indicate frequencies of the different variations. Scale bar=1mm. (CV = Coronary Vein; CSO = Coronary Sinus Orifice; \*\*\*\*p<0.0001; ns = no significance, unpaired t-test).

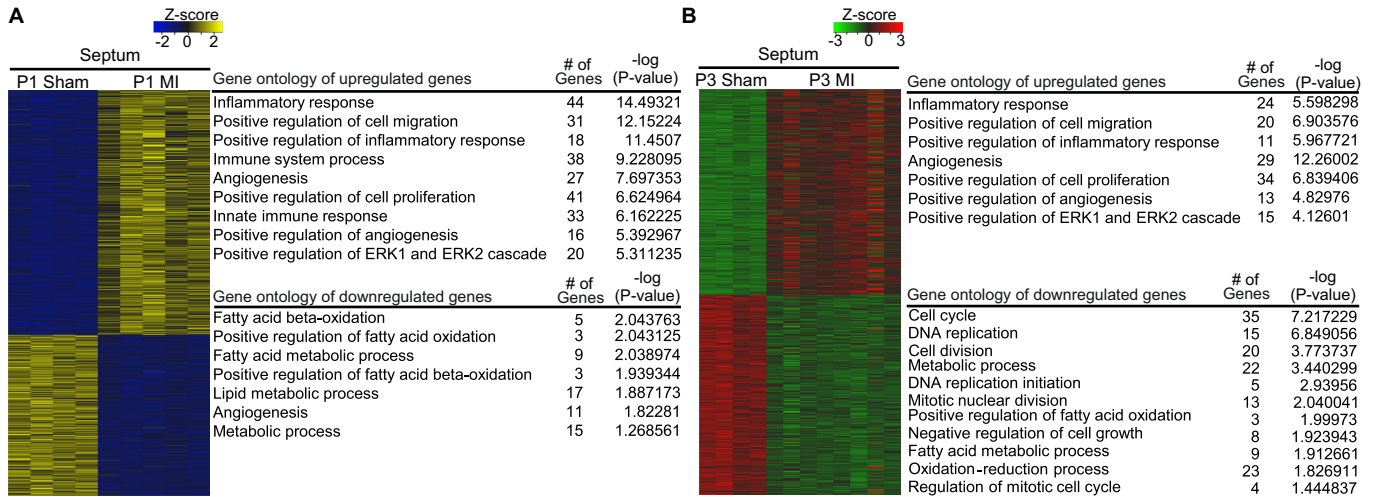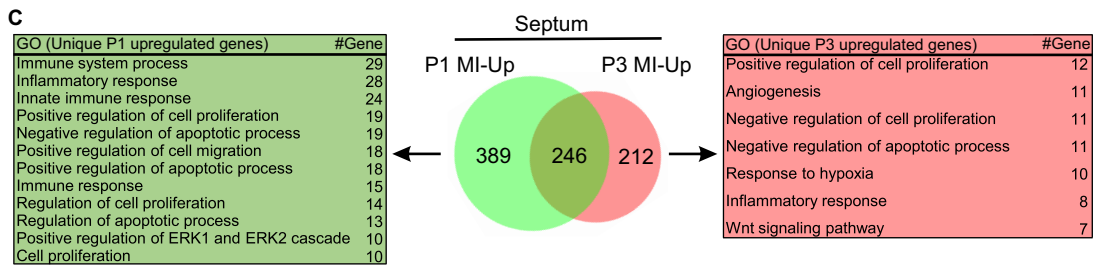

**Supplemental Figure 3: Transcriptome analysis of the septum in P1 and P3 MI and sham hearts at 1 dps.**

(**A** and **B**) Heatmap showing differentially up- (upper part of tables) and downregulated (lower part of tables) genes and selected GOs of biological processes in the septum of P1 (**A**) and P3 MI (**B**) hearts compared to sham hearts. (**C**) Venn diagram illustrating overlap of overexpressed genes in the septum. Left (P1) and right (P3) tables display selected GOs of biological processes of uniquely upregulated genes in MI hearts.

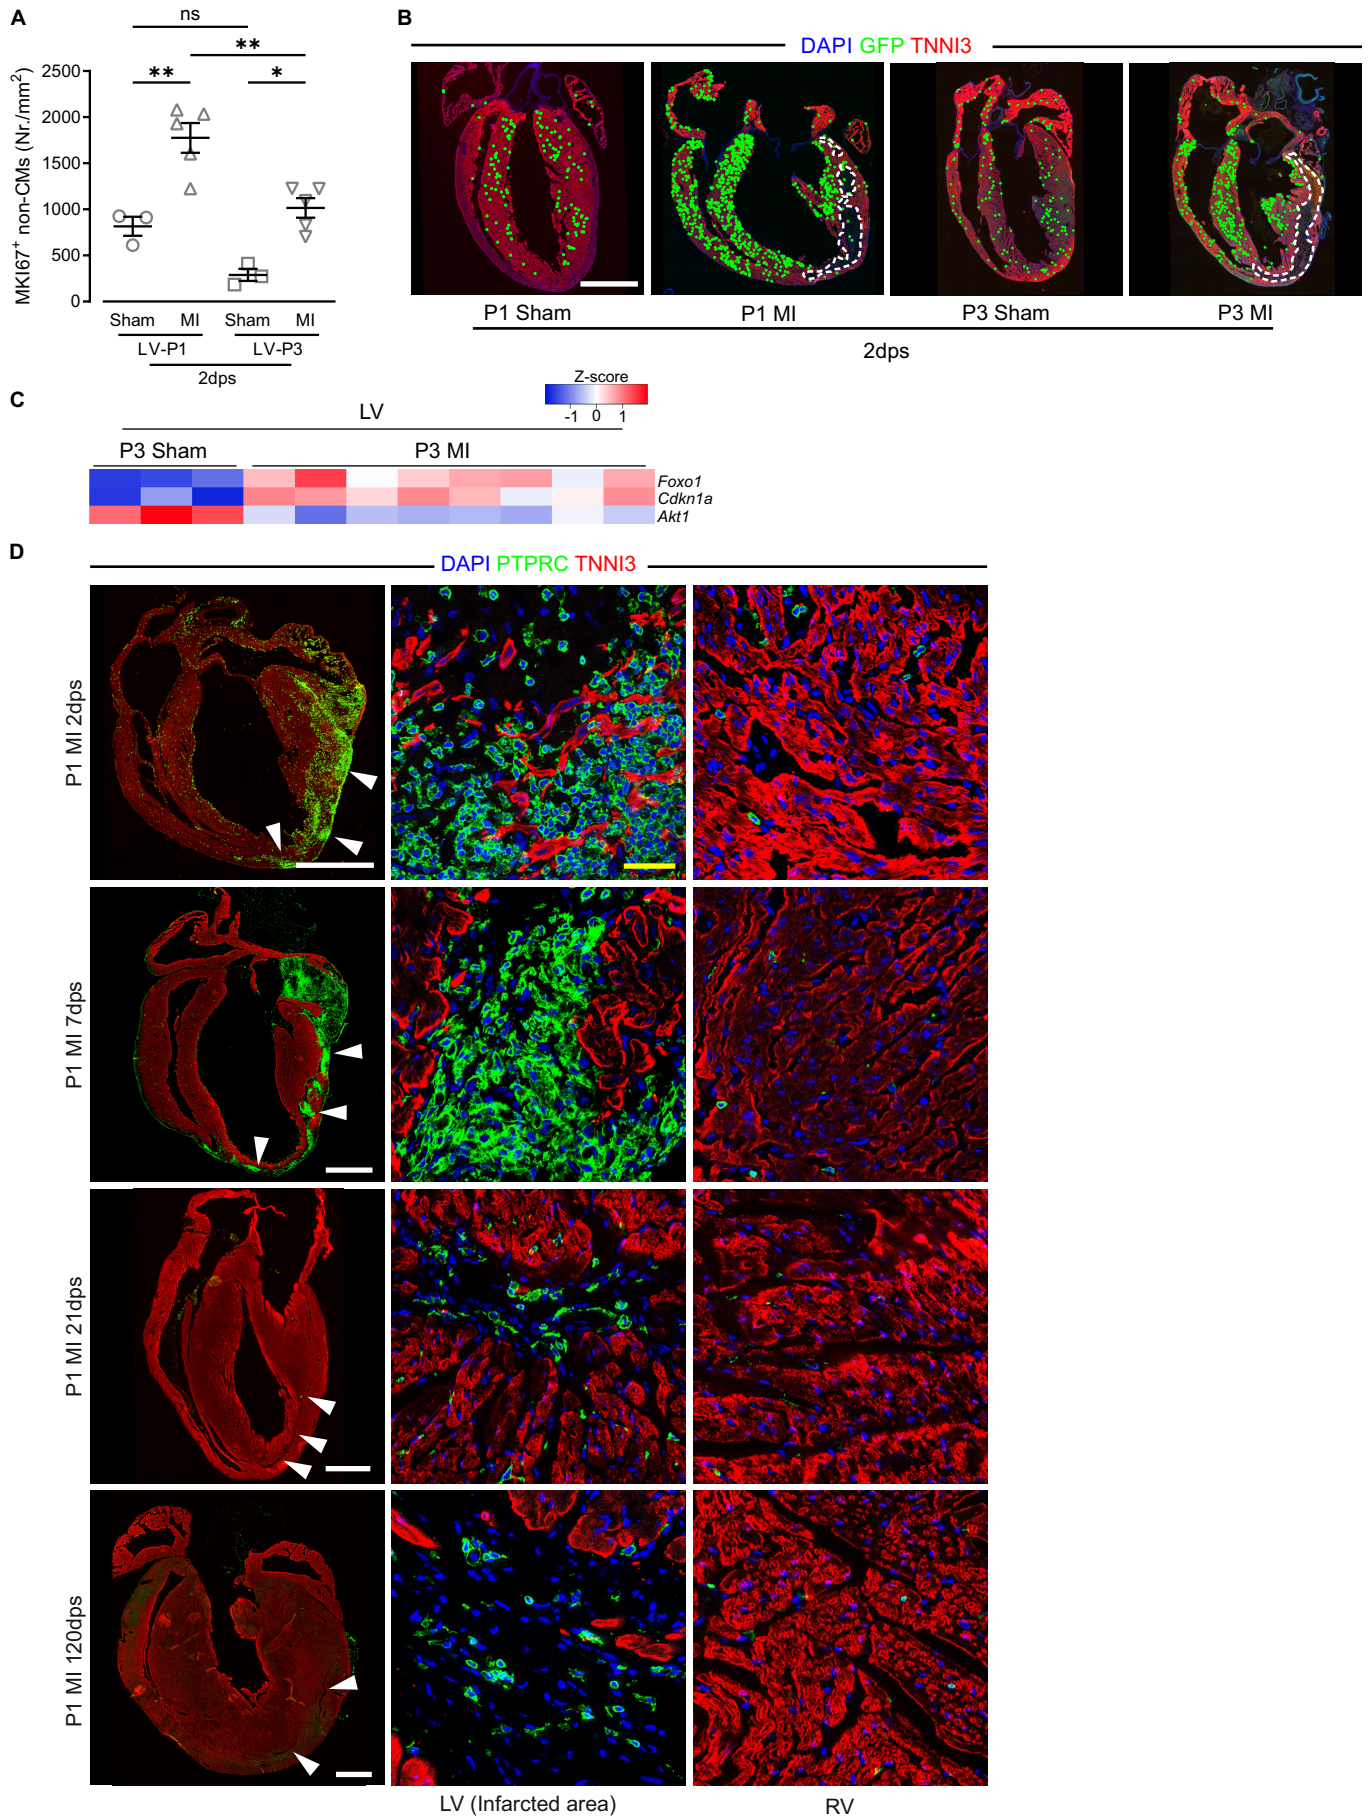

**Supplemental Figure 4: Increased proliferation of non-CMs and CMs, and strong inflammation in P1 and P3 MI, and sham hearts.**

(A) Quantitation of MKI67<sup>+</sup> non-CMs in LV heart sections. (B) Mosaic whole-heart images of *CAG-eGFP-anillin* hearts co-stained against eGFP and TNNI3. eGFP<sup>+</sup> CMs are manually marked with green dots to visualize the distribution pattern of cycling CMs. (C) Heatmap showing the gene expression of *Foxo1*, *Cdkn1a* and *Akt1* in the LV of MI and sham hearts. (D) Mosaic (left panels) and magnified images (middle and right panels) of heart sections co-stained against PTPRC and TNNI3; arrowheads indicate infarcted or scarred areas; white scale bars=1mm; yellow scale bar=40µm. (\*p<0.05; \*\*p<0.01; ns = no significance; one-way ANOVA with Holm-Šídák post hoc test).

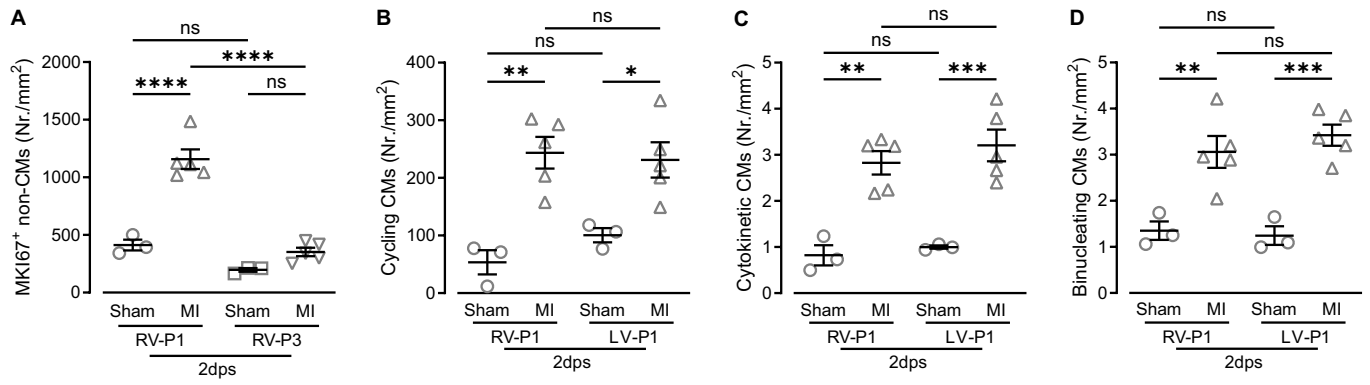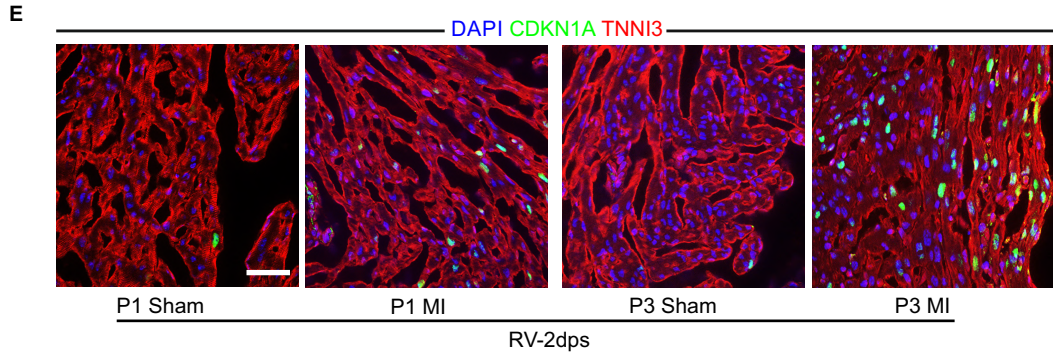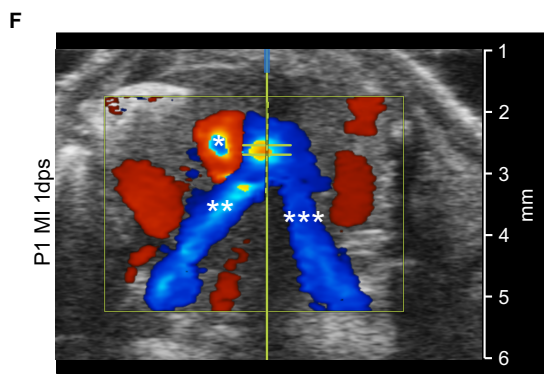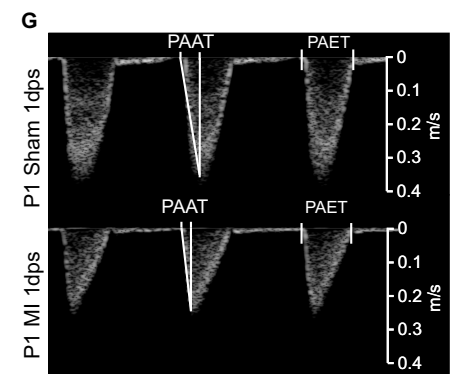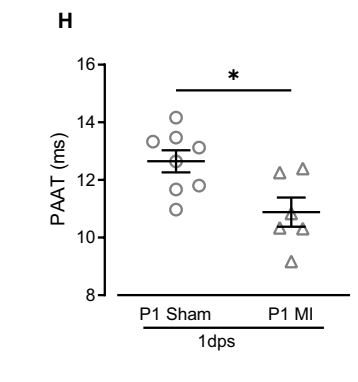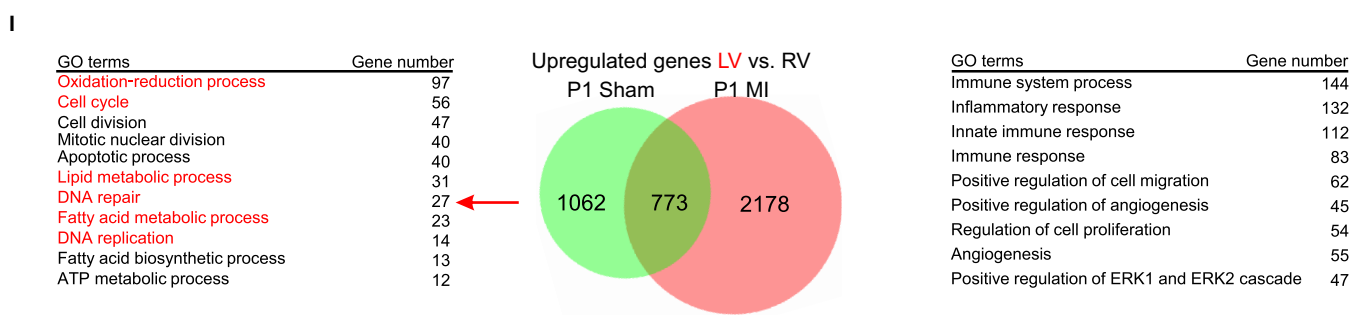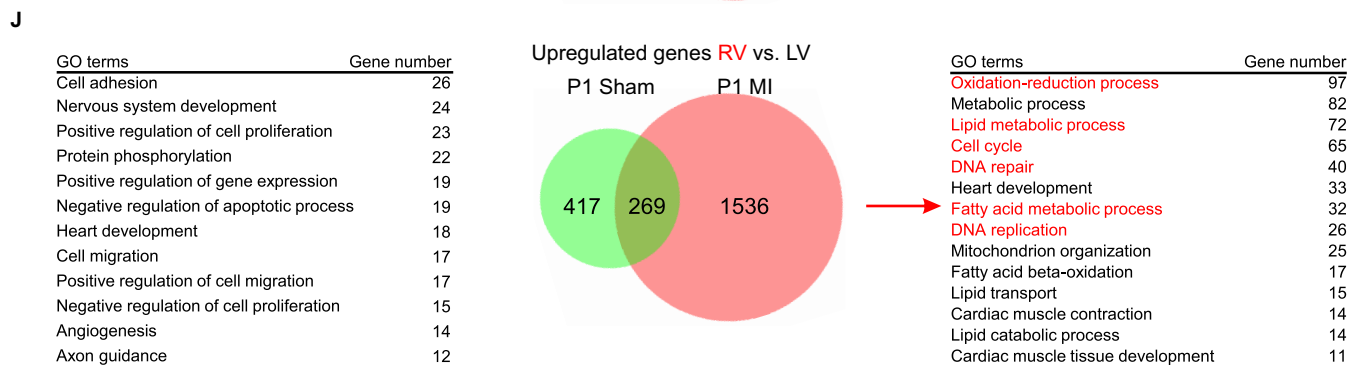

**Supplemental Figure 5: Proliferation, CDKN1A protein expression, and transcriptome analysis (at 1 dps) in the RV and LV of P1, P3 MI and sham hearts; Doppler measurements of the blood flow in the pulmonary artery in P1 MI and sham hearts at 1 dps.**

(A) Quantitation of MKI67<sup>+</sup> non-CMs in RV. (B-D) Quantitation of cycling (B), cytokinetic (C) and binucleating (D) CMs in RV and LV of *CAG-eGFP-anillin* mice. (E) RV heart sections co-stained against CDKN1A, TNNI3 and DAPI; scale bar=40µm. (F) Colour doppler of the main pulmonary artery in a P1 MI heart: \*ascending aorta; \*\*right pulmonary artery; \*\*\*left pulmonary artery. (G) Flow velocity curve measured in the main pulmonary artery in a P1 MI and sham heart; PAAT: pulmonary artery acceleration time; PAET: pulmonary artery ejection time. (H) Doppler measurements of PAAT in the pulmonary artery. (I and J) Venn diagram comparing upregulated genes in the LV to RV (I) and in the RV to LV (J) in MI and sham hearts. Tables on the left and right show representative GO of biological processes, similar GO terms in sham LV (I) and MI RV (J) hearts are highlighted in red. \*p<0.05; \*\*p<0.01; \*\*\*p<0.001; \*\*\*\*p<0.0001; ns = no significance; A-D: one-way ANOVA with Holm-Šídák post hoc test; H unpaired t-test).

**Supplemental Table 1: Echocardiography parameters**

| Condition | Time point | EF ± SEM (%)         | FS ± SEM (%)         | CO ± SEM (ml/min)    | LVEDA ± SEM (mm <sup>2</sup> ) | Wall thickness ± SEM (mm) | RV FAC ± SEM (%)     | RV length ± SEM (mm) | RVEDA ± SEM (mm <sup>2</sup> ) | PAAT ± SEM (ms)     | PAAT/PAET ± SEM (ratio) |
|-----------|------------|----------------------|----------------------|----------------------|--------------------------------|---------------------------|----------------------|----------------------|--------------------------------|---------------------|-------------------------|
| P1 Sham   | 1dps       | 86.02 ± 2.39<br>n=9  | 20.82 ± 2.81<br>n=9  | /                    | 3.14 ± 0.13<br>n=9             | 0.40 ± 0.03<br>n=9        | 57.07 ± 6.13<br>n=9  | 4.00 ± 0.06<br>n=9   | 0.77 ± 0.07<br>n=9             | 12.65 ± 0.38<br>n=8 | 0.23 ± 0.01<br>n=8      |
|           | 7dps       | 79.10 ± 2.02<br>n=8  | 21.97 ± 1.21<br>n=8  | /                    | 4.86 ± 0.33<br>n=8             | 0.69 ± 0.03<br>n=8        | 46.46 ± 3.68<br>n=8  | 6.09 ± 0.31<br>n=7   | 1.57 ± 0.17<br>n=8             | /                   | /                       |
|           | 14dps      | 70.48 ± 3.65<br>n=8  | 22.31 ± 1.81<br>n=8  | /                    | 12.45 ± 0.52<br>n=8            | /                         | /                    | 7.90 ± 0.30<br>n=7   | /                              | /                   | /                       |
|           | 21dps      | 67.34 ± 2.41<br>n=7  | 17.22 ± 1.83<br>n=7  | /                    | 17.63 ± 0.90<br>n=7            | /                         | /                    | 9.75 ± 0.15<br>n=7   | /                              | /                   | /                       |
|           | 120dps     | 43.79 ± 3.34<br>n=8  | 11.62 ± 1.14<br>n=8  | 17.58 ± 1.56<br>n=8  | 27.94 ± 2.29<br>n=8            | /                         | /                    | 12.48 ± 0.33<br>n=7  | /                              | /                   | /                       |
| P1 MI     | 1dps       | 15.92 ± 2.87<br>n=11 | 3.78 ± 0.74<br>n=11  | /                    | 5.47 ± 0.32<br>n=11            | 0.31 ± 0.02<br>n=11       | 48.44 ± 5.61<br>n=11 | 4.55 ± 0.11<br>n=11  | 0.70 ± 0.07<br>n=11            | 10.88 ± 0.51<br>n=6 | 0.17 ± 0.01<br>n=6      |
|           | 7dps       | 60.63 ± 4.37<br>n=10 | 17.67 ± 1.66<br>n=10 | /                    | 5.71 ± 0.66<br>n=9             | 0.64 ± 0.02<br>n=9        | 46.23 ± 3.28<br>n=10 | 7.65 ± 0.24<br>n=11  | 1.50 ± 0.19<br>n=10            | /                   | /                       |
|           | 14dps      | 58.40 ± 2.14<br>n=10 | 16.29 ± 1.19<br>n=10 | /                    | 12.85 ± 0.33<br>n=10           | /                         | /                    | 11.22 ± 0.25<br>n=11 | /                              | /                   | /                       |
|           | 21dps      | 59.31 ± 2.23<br>n=11 | 17.57 ± 1.31<br>n=11 | /                    | 16.82 ± 0.64<br>n=11           | /                         | /                    | 13.06 ± 0.31<br>n=11 | /                              | /                   | /                       |
|           | 120dps     | 39.87 ± 3.80<br>n=11 | 12.24 ± 1.27<br>n=11 | 18.56 ± 1.66<br>n=11 | 28.41 ± 1.18<br>n=11           | /                         | /                    | 16.72 ± 0.37<br>n=11 | /                              | /                   | /                       |
| P3 Sham   | 1dps       | 79.57 ± 2.72<br>n=5  | 22.19 ± 3.88<br>n=5  | /                    | 4.82 ± 0.31<br>n=5             | 0.41 ± 0.02<br>n=5        | 52.66 ± 5.89<br>n=5  | /                    | 0.91 ± 0.15<br>n=5             | /                   | /                       |
|           | 7dps       | 83.91 ± 3.61<br>n=5  | 26.64 ± 3.01<br>n=5  | /                    | 6.37 ± 0.66<br>n=5             | 0.60 ± 0.04<br>n=5        | 58.55 ± 3.74<br>n=5  | /                    | 2.14 ± 0.43<br>n=5             | /                   | /                       |
| P3 MI     | 1dps       | 8.79 ± 1.00<br>n=7   | 4.83 ± 1.83<br>n=7   | /                    | 7.95 ± 0.31<br>n=7             | 0.23 ± 0.02<br>n=7        | 23.70 ± 4.20<br>n=8  | /                    | 1.72 ± 0.11<br>n=8             | /                   | /                       |
|           | 7dps       | 10.02 ± 1.07<br>n=7  | 7.59 ± 1.44<br>n=7   | /                    | 16.50 ± 1.73<br>n=7            | 0.21 ± 0.07<br>n=7        | 15.88 ± 3.80<br>n=7  | /                    | 3.43 ± 0.45<br>n=7             | /                   | /                       |

**Supplemental Table 2: Descriptive statistics**

| Parameter                                         | Condition         | n= | Average $\pm$ S.E.M  | Related figures          |
|---------------------------------------------------|-------------------|----|----------------------|--------------------------|
| Injury/scar size (%)                              | P1 MI 2dps        | 5  | 38.99 $\pm$ 1.18     | Figure 1B                |
|                                                   | P1 MI 7dps        | 5  | 19.40 $\pm$ 2.88     |                          |
|                                                   | P1 MI 21dps       | 5  | 6.59 $\pm$ 0.33      |                          |
|                                                   | P1 MI 120dps      | 4  | 2.92 $\pm$ 0.10      |                          |
|                                                   | P3 MI 2dps        | 6  | 42.74 $\pm$ 1.64     | Figure 1E                |
|                                                   | P3 MI 7dps        | 6  | 70.41 $\pm$ 2.99     |                          |
| CM cross-sectional area ( $\mu\text{m}^2$ )       | P1 Sham 7dps LV   | 4  | 63.23 $\pm$ 3.59     | Figure 1L                |
|                                                   | P1 MI 7dps LV     | 8  | 82.10 $\pm$ 3.55     |                          |
|                                                   | P3 Sham 7dps LV   | 3  | 63.21 $\pm$ 6.01     |                          |
|                                                   | P3 MI 7dps LV     | 6  | 110.11 $\pm$ 1.06    |                          |
|                                                   | P1 Sham 120dps RV | 7  | 259.45 $\pm$ 22.43   | Figure 2N                |
|                                                   | P1 MI 120dps RV   | 8  | 371.70 $\pm$ 23.11   |                          |
|                                                   | P3 Sham 120dps LV | 7  | 271.17 $\pm$ 9.75    |                          |
|                                                   | P3 MI 120dps LV   | 8  | 346.33 $\pm$ 23.11   |                          |
|                                                   | P1 Sham 4dps RV   | 3  | 34.52 $\pm$ 0.24     | Figure 8D                |
|                                                   | P1 MI 4dps RV     | 3  | 39.44 $\pm$ 1.04     |                          |
|                                                   | P3 Sham 4dps RV   | 3  | 41.37 $\pm$ 0.88     |                          |
|                                                   | P3 MI 4dps RV     | 3  | 84.88 $\pm$ 2.11     |                          |
| CM length/width (ratio) in RV                     | P1 Sham 120dps    | 7  | 6.55 $\pm$ 0.25      | Figure 2J                |
|                                                   | P1 MI 120dps      | 9  | 6.98 $\pm$ 0.21      |                          |
| HW/TL (g/mm)                                      | P1 Sham 120dps    | 22 | 0.0093 $\pm$ 0.00043 | Figure 2L                |
|                                                   | P1 MI 120dps      | 22 | 0.012 $\pm$ 0.00048  |                          |
| HW/BW (mg/g)                                      | P1 Sham 120dps    | 22 | 4.84 $\pm$ 0.13      | Supplemental Figure 2A   |
|                                                   | P1 MI 120dps      | 22 | 6.05 $\pm$ 0.18      |                          |
| MKI67 <sup>+</sup> CMs (Nr./mm <sup>2</sup> )     | P1 Sham 2dps LV   | 3  | 329.40 $\pm$ 26.65   | Figure 4B<br>Figure 7B-C |
|                                                   | P1 MI 2dps LV     | 5  | 506.17 $\pm$ 31.93   |                          |
|                                                   | P3 Sham 2dps LV   | 3  | 162.62 $\pm$ 6.55    |                          |
|                                                   | P3 MI 2dps LV     | 5  | 274.28 $\pm$ 23.12   |                          |
|                                                   | P1 Sham 2dps RV   | 3  | 248.79 $\pm$ 28.46   | Figure 7B                |
|                                                   | P1 MI 2dps RV     | 5  | 657.32 $\pm$ 30.30   |                          |
|                                                   | P3 Sham 2dps RV   | 3  | 125.84 $\pm$ 22.00   | Figure 7C                |
|                                                   | P3 MI 2dps RV     | 5  | 233.24 $\pm$ 17.76   |                          |
| MKI67 <sup>+</sup> non-CMs (Nr./mm <sup>2</sup> ) | P1 Sham 2dps LV   | 3  | 816.47 $\pm$ 102.47  | Supplemental Figure 4A   |
|                                                   | P1 MI 2dps LV     | 5  | 1775.05 $\pm$ 160.65 |                          |
|                                                   | P3 Sham 2dps LV   | 3  | 289.51 $\pm$ 66.04   |                          |
|                                                   | P3 MI 2dps LV     | 5  | 1015.25 $\pm$ 106.29 |                          |
|                                                   | P1 Sham 2dps RV   | 3  | 412.32 $\pm$ 46.57   | Supplemental Figure 5A   |
|                                                   | P1 MI 2dps RV     | 5  | 1157.28 $\pm$ 84.57  |                          |
|                                                   | P3 Sham 2dps RV   | 3  | 196.72 $\pm$ 15.80   |                          |
|                                                   | P3 MI 2dps RV     | 5  | 352.37 $\pm$ 36.18   |                          |

**Supplemental Table 2 (continued)**

| Parameter                                      | Condition       | n= | Average ± S.E.M | Related figures                     |
|------------------------------------------------|-----------------|----|-----------------|-------------------------------------|
| Cycling CMs (Nr./mm <sup>2</sup> )             | P1 Sham 2dps LV | 3  | 100.42 ± 12.32  | Figure 4D<br>Supplemental Figure 5B |
|                                                | P1 MI 2dps LV   | 5  | 231.04 ± 30.64  |                                     |
|                                                | P3 Sham 2dps LV | 7  | 78.92 ± 17.85   |                                     |
|                                                | P3 MI 2dps LV   | 7  | 78.67 ± 21.16   |                                     |
|                                                | P1 Sham 2dps RV | 3  | 53.66 ± 21.00   | Figure 7D<br>Supplemental Figure 5B |
|                                                | P1 MI 2dps RV   | 5  | 243.60 ± 27.55  |                                     |
|                                                | P3 Sham 2dps RV | 7  | 41.69 ± 7.88    |                                     |
|                                                | P3 MI 2dps RV   | 7  | 132.58 ± 23.45  |                                     |
| Cytokinetic CMs (Nr./mm <sup>2</sup> )         | P1 Sham 2dps LV | 3  | 1.00 ± 0.04     | Figure 4F<br>Supplemental Figure 5C |
|                                                | P1 MI 2dps LV   | 5  | 3.20 ± 0.34     |                                     |
|                                                | P3 Sham 2dps LV | 3  | 0.19 ± 0.05     |                                     |
|                                                | P3 MI 2dps LV   | 4  | 0.40 ± 0.06     |                                     |
|                                                | P1 Sham 2dps RV | 3  | 0.82 ± 0.22     | Figure 7E<br>Supplemental Figure 5C |
|                                                | P1 MI 2dps RV   | 5  | 2.83 ± 0.26     |                                     |
|                                                | P3 Sham 2dps RV | 3  | 0.23 ± 0.02     |                                     |
|                                                | P3 MI 2dps RV   | 4  | 0.69 ± 0.11     |                                     |
| Binucleating CMs (Nr./mm <sup>2</sup> )        | P1 Sham 2dps LV | 3  | 1.35 ± 0.20     | Figure 4G<br>Supplemental Figure 5D |
|                                                | P1 MI 2dps LV   | 5  | 3.06 ± 0.35     |                                     |
|                                                | P3 Sham 2dps LV | 3  | 0.70 ± 0.03     |                                     |
|                                                | P3 MI 2dps LV   | 4  | 1.38 ± 0.28     |                                     |
|                                                | P1 Sham 2dps RV | 3  | 1.25 ± 0.20     | Figure 7F<br>Supplemental Figure 5D |
|                                                | P1 MI 2dps RV   | 5  | 3.42 ± 0.23     |                                     |
|                                                | P3 Sham 2dps RV | 3  | 0.68 ± 0.11     |                                     |
|                                                | P3 MI 2dps RV   | 4  | 1.51 ± 0.18     |                                     |
| CM binucleation rate at P5 (%)                 | P1 Sham         | 3  | 12.12 ± 0.96    | Figure 4I                           |
|                                                | P1 MI           | 9  | 16.98 ± 0.90    |                                     |
|                                                | P3 Sham         | 6  | 10.51 ± 0.54    |                                     |
|                                                | P3 MI           | 6  | 12.47 ± 0.84    |                                     |
| CDKN1A <sup>+</sup> CMs (Nr./mm <sup>2</sup> ) | P1 Sham 2dps LV | 4  | 102.97 ± 37.79  | Figure 5B                           |
|                                                | P1 MI 2dps LV   | 6  | 322.90 ± 46.25  |                                     |
|                                                | P3 Sham 2dps LV | 6  | 94.73 ± 13.68   |                                     |
|                                                | P3 MI 2dps LV   | 5  | 788.32 ± 160.20 |                                     |
|                                                | P1 Sham 2dps RV | 4  | 76.68 ± 16.73   | Figure 7G                           |
|                                                | P1 MI 2dps RV   | 6  | 345.39 ± 15.98  |                                     |
|                                                | P3 Sham 2dps RV | 6  | 79.23 ± 8.83    |                                     |
|                                                | P3 MI 2dps RV   | 5  | 709.35 ± 86.90  |                                     |

**Supplemental Table 2 (continued)**

| <b>Parameter</b>                                                     | <b>Condition</b> | <b>n=</b> | <b>Average ± S.E.M</b> | <b>Related figures</b> |
|----------------------------------------------------------------------|------------------|-----------|------------------------|------------------------|
| cCASP3 <sup>+</sup> /DAPI <sup>+</sup> CMs<br>(Nr./mm <sup>2</sup> ) | P1 Sham 2dps     | 3         | 512.95 ± 111.00        | Figure 5E              |
|                                                                      | P3 MI 2dps       | 3         | 1208.80 ± 85.06        |                        |
| TUNEL <sup>+</sup> /DAPI <sup>+</sup> CMs<br>(Nr./mm <sup>2</sup> )  | P1 Sham 2dps     | 5         | 235.37 ± 30.05         | Figure 5G              |
|                                                                      | P3 MI 2dps       | 5         | 1252.18 ± 165.46       |                        |
| PTPRC <sup>+</sup> /DAPI <sup>+</sup> CMs<br>(Nr./mm <sup>2</sup> )  | P1 Sham 2dps     | 5         | 2190.26 ± 397.03       | Figure 5I              |
|                                                                      | P3 MI 2dps       | 5         | 509.07 ± 44.28         |                        |
| Capillary density<br>(EC/CM)                                         | P1 Sham 7dps LV  | 4         | 0.92 ± 0.03            | Figure 5K              |
|                                                                      | P1 MI 7dps LV    | 8         | 0.96 ± 0.04            |                        |
|                                                                      | P3 Sham 7dps LV  | 3         | 1.16 ± 0.04            |                        |
|                                                                      | P3 MI 7dps LV    | 6         | 0.91 ± 0.05            |                        |
|                                                                      | P1 Sham 7dps RV  | 4         | 0.92 ± 0.05            | Figure 8F              |
|                                                                      | P1 MI 7dps RV    | 8         | 1.16 ± 0.03            |                        |
|                                                                      | P3 Sham 7dps RV  | 3         | 1.00 ± 0.07            |                        |
|                                                                      | P3 MI 7dps RV    | 6         | 0.80 ± 0.02            |                        |
| RV thickness (µm)                                                    | P1 Sham 4dps     | 3         | 256.40 ± 4.43          | Figure 8B              |
|                                                                      | P1 MI 4dps       | 3         | 369.36 ± 20.79         |                        |
|                                                                      | P3 Sham 4dps     | 3         | 403.40 ± 3.23          |                        |
|                                                                      | P3 MI 4dps       | 3         | 324.14 ± 9.83          |                        |
